# Supplementary material for: Nationalisation et décentralisation, deux concepts compatibles : exemplarité en ce domaine du cas d'Electricité de France et d'Electricité de Strasbourg
Source: Royal Society of Chemistry journal article supplement (doi:10.1039/d0an02220a), 1988-01-01
Supplement: d0an02220a1.pdf [file d0an02220a1.pdf]

Electronic Supplementary Information for

## Using Machine Learning to Identify and Quantify Endotoxins from Different Bacterial Species using Liquid Crystal Droplets

### Authors

Shengli Jiang<sup>1,2</sup>, JungHyun Noh<sup>1,3</sup>, Chulsoon Park<sup>1,2</sup>, Alexander D. Smith<sup>2</sup>,

Nicholas L. Abbott<sup>3\*</sup>, Victor M. Zavala<sup>2\*</sup>

<sup>2</sup>Department of Chemical and Biological Engineering, University of Wisconsin- Madison,  
1415 Engineering Dr, Madison, WI 53706, USA.

<sup>3</sup>Smith School of Chemical and Biomolecular Engineering, Cornell University,  
113 Ho Plaza, Ithaca, NY 14853, USA.

<sup>1</sup>Equally contributing authors

\* **Equal corresponding Authors:** victor.zavala@wisc.edu and nla34@cornell.edu

### Supplementary Experimental Methods

**Detailed description of serial dilutions of endotoxin solutions.** Prior to dilution, each stock solution of endotoxin (1 mg/mL) was stirred by vortexing at 3000 rpm for 5 seconds. Our experiments were conducted using two different procedures, which we detail below:

(i) With microcentrifuge tubes of type A:

- First, the stock solution of endotoxin (1 mg/mL) was diluted to 10  $\mu$ g/mL using PBS buffer (no added SDS) in the type A microcentrifuge tube. Specifically, 9  $\mu$ L of the stock solution of endotoxin was added to 891  $\mu$ L of PBS buffer to make a solution with a total volume of 900  $\mu$ L. The solution was mixed by vortexing at 3000 rpm for 20 seconds.
- The 10  $\mu$ g/mL solution was then diluted 10-fold to 1  $\mu$ g/mL using PBS buffer in a microcentrifuge

tube of type A by adding 90  $\mu\text{L}$  of 10  $\mu\text{g}/\text{mL}$  endotoxin solution to 810  $\mu\text{L}$  of the PBS buffer. Subsequently, the solution was vortexed at 3000 rpm for 5 seconds. Further serial dilutions were performed to reach a final concentration of 0.1  $\text{pg}/\text{mL}$ .

- The procedure above was repeated to achieve concentrations of endotoxin ranging from 1  $\mu\text{g}/\text{mL}$  to 0.01  $\text{pg}/\text{mL}$ . After dilution, each solution was vortexed for 5 seconds. 700  $\mu\text{L}$  of each diluted solution was transferred to a polystyrene tube.
- Finally, 35  $\mu\text{L}$  of LC emulsion was added to 700  $\mu\text{L}$  of each endotoxin solution, and the endotoxin-LC emulsions were incubated for 30 minutes, prior to flow cytometry measurement.

(ii) With cleaned type B microcentrifuge tubes:

- The stock solution was diluted to 10  $\mu\text{g}/\text{mL}$  using PBS containing 27  $\mu\text{M}$  SDS in the rinsed microcentrifuge tube of Type B. Specifically, 9  $\mu\text{L}$  of the stock solution was added to 891  $\mu\text{L}$  of the PBS buffer, thus a total volume of the solution becomes 900  $\mu\text{L}$ . The diluted solution was mixed by vortexing for 20 seconds.
- The 10  $\mu\text{g}/\text{mL}$  solution was diluted 10-fold to 1  $\mu\text{g}/\text{mL}$  in a microcentrifuge tube of Type B using 27  $\mu\text{M}$  SDS in PBS. Specifically, 90  $\mu\text{L}$  of 10  $\mu\text{g}/\text{mL}$  endotoxin solution was added to 810  $\mu\text{L}$  of the PBS buffer to achieve a total solution volume of 900  $\mu\text{L}$ . Afterward, the solution was mixed by vortexing at 3000 rpm for 5 seconds. Further serial dilutions were performed to reach a final concentration of 0.01  $\text{pg}/\text{mL}$ . Each solution was vortexed for 50 seconds. 700  $\mu\text{L}$  of each diluted solution was transferred to a polystyrene tube.
- Finally, 35  $\mu\text{L}$  of LC emulsion was added to 700  $\mu\text{L}$  of each endotoxin solution and the endotoxin-LC emulsions were incubated for 30 minutes, prior to flow cytometry measurement.

**Preparation of 10 mM PBS buffer.** Powdered phosphate-buffered saline was dissolved in 1 L of deionized water to prepare 10 mM phosphate-buffered saline at 137 mM NaCl, 0.27 mM KCl, pH 7.4 at 25°C. For this process, a 1 L volumetric flask was used.

**Preparation of 27  $\mu\text{M}$  or 5  $\mu\text{M}$  SDS solution.** First, 10 mM SDS solution was prepared by adding 0.568 g of SDS to 20 mL of 10 mM PBS buffer in a 20 mL glass vial. The solution was mixed by vortexer (Fisher Scientific brand, catalog number 0215370) at 3000 rpm for 60 seconds. The 10 mM SDS solution was then diluted 10-fold to reach a concentration of 1 mM SDS in a 20 mL glass vial. After mixing by vortexing, 540  $\mu\text{L}$  of 1 mM SDS solution was added to 19.46 mL of 10 mM PBS buffer. The final solution containing 27  $\mu\text{M}$  SDS was mixed by vortexing at 3000 rpm for 30 seconds. A similar procedure was used to prepare 5  $\mu\text{M}$  SDS in PBS.

## Supplementary Figures

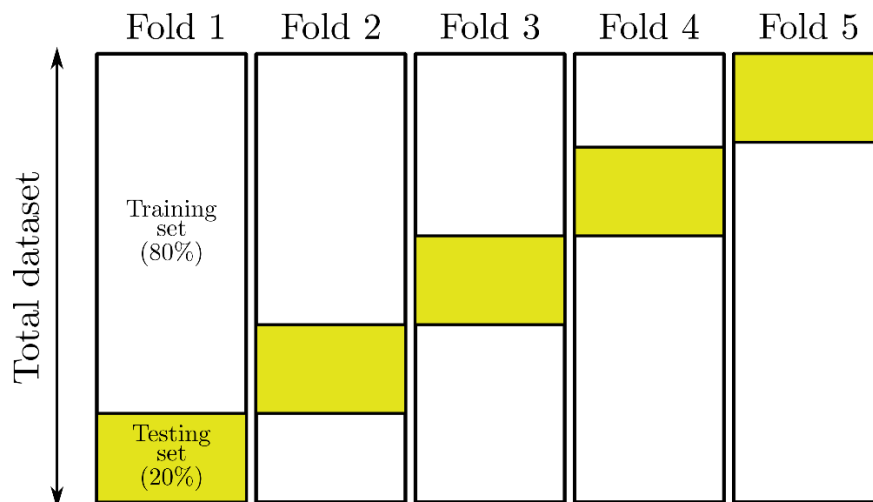

**Figure S1. Data training and testing (or prediction) procedure based on a 5-fold approach.** In the first fold, 80% of data was randomly selected for training and 20% for prediction. After training the first fold, 80% of the total dataset was selected again randomly as the second fold training and 20% of the data was selected for prediction. After five trainings, all test data can form a complete dataset, thus all the data in the dataset was tested.

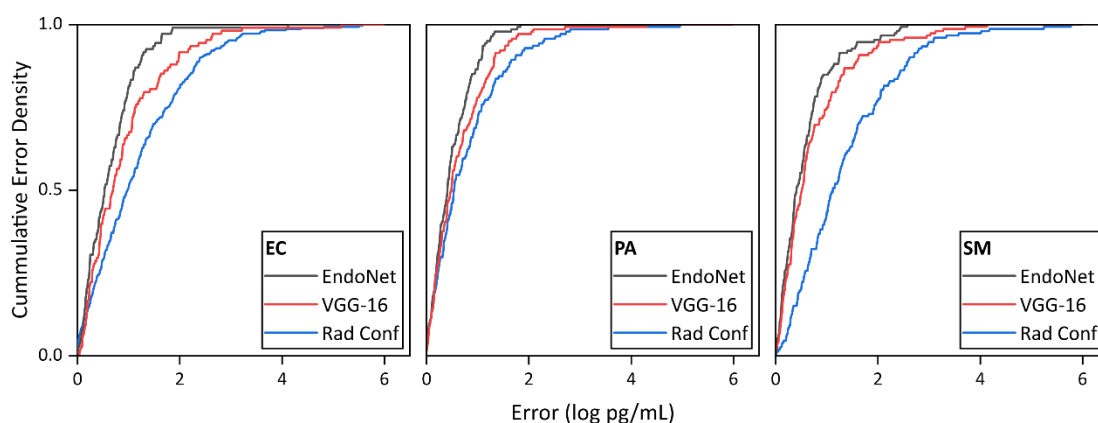

**Figure S2. Cumulative frequencies for prediction errors.** Cumulative frequency for prediction error using different methods for EC (left), PA (middle), and SM (right). For all bacterial species, the EndoNet curve (black) dominates that of VGG-16 and radial configuration curves (red and blue). This comparison demonstrates that EndoNet consistently has a higher probability of having the smallest prediction error.

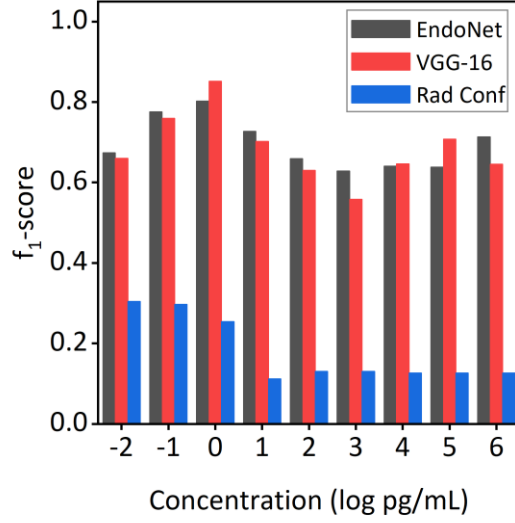

**Figure S3.  $f_1$ -score for LPS species classification.**  $f_1$ -score for LPS classification (SM, EC or PA) at various concentrations of endotoxin. EndoNet has an overall higher  $f_1$ -score for multi-class classification. When the  $f_1$ -score is closer to one, the classification has a better accuracy.

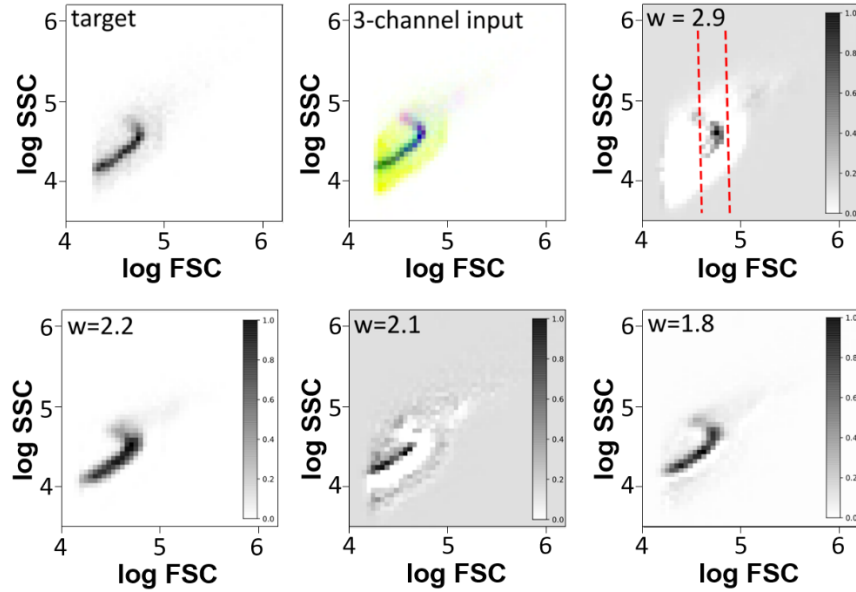

**Figure S4. Convolutional feature map analysis of EndoNet.** EndoNet feature maps (activated images) that have the highest weights of classification for SM at 1 pg/mL. The target image is in  $\mathbb{R}^{50 \times 50}$ , and the input to the CNN (reference images) has three channels ( $\mathbb{R}^{50 \times 50 \times 3}$ ). Between the two red dashed lines is the characteristic “S-region”. The feature map with  $w = 2.9$  is looking at the “S-region” similar to the RC method. The feature maps with  $w = 2.2, 2.1$  and  $1.8$  are focusing on the diagonal patterns of the original input to the CNN. Color bars next to the feature maps indicate the normalized pixel intensity (a large value indicates a

high filter activation).
